# Supplementary material for: Mitochondrial Translation Inhibition Triggers an Rst2-Controlled Transcriptional Reprogramming of Carbon Metabolism in Stationary-Phase Cells of Fission Yeast
Source: MDPI journal article supplement (doi:10.3390/biom15101354), 2025-09-24
Supplement: s1 [file Supplementary information_clean copy.pdf › Supplementary information_clean copy.pdf]

## Supplementary materials

### Mitochondrial translation inhibition triggers a Rst2-controlled transcriptional reprogramming of carbon metabolism in stationary-phase cells of fission yeast

Ying Luo <sup>1,2</sup>, Shaimaa Hassan <sup>1</sup>, Saniya Raut <sup>1</sup> and Jürg Bähler <sup>1\*</sup>

<sup>1</sup>Institute of Healthy Ageing, Department of Genetics, Evolution & Environment,  
University College London, London WC1E 6BT, United Kingdom

<sup>2</sup>Jiangsu Key Laboratory for Microbes and Genomics, School of Life Sciences,  
Nanjing Normal University, Nanjing 210023, China

\* Correspondence: [j.bahler@ucl.ac.uk](mailto:j.bahler@ucl.ac.uk) (J.B.)

**Table S1: *S. pombe* strains used in this study**

| Strain | Genotype                                                     | Source     |
|--------|--------------------------------------------------------------|------------|
| JB22   | <i>h<sup>-</sup></i> 972 ( <i>S. pombe</i> wild type)        | Lab stock  |
| yLY1   | <i>h<sup>-</sup> rst2:: kanMX6</i>                           | This study |
| yLY2   | <i>h<sup>-</sup> scr1:: kanMX6</i>                           | This study |
| yLY3   | <i>h<sup>+</sup> rst2:: natMX6</i>                           | This study |
| yHS1   | <i>h<sup>+</sup> natMX6@(NC 003421.2:1959559 1959560ins)</i> | This study |

**Table S2: Primers used in this study**

| Primer Name                                      | Primer Sequence (5' to 3')                            |
|--------------------------------------------------|-------------------------------------------------------|
| Primers for deletion of <i>rst2</i>              |                                                       |
| $\Delta rst2$ -up-F                              | CTTGTTTATCTGTGCTATTACTG                               |
| $\Delta rst2$ -up-R                              | TATTCTGGGCCTCCATGTCGATAAAACAAGTTTTC                   |
| $\Delta rst2$ -kanMX6-F                          | ACTTGTTTTATCGACATGGAGGCCCAAGAATAC                     |
| $\Delta rst2$ - kanMX6-R                         | TATAAAGATATGAAAAAACAGTATAGCGACCAGC<br>ATTCAC          |
| $\Delta rst2$ -down-F                            | GTGAATGCTGGTCGCTATACTGTTTTTTTCATATCTT<br>TATATTTTATAC |
| $\Delta rst2$ -down-R                            | GTGCATGCAGAGTGAATG                                    |
| Primers for verification of <i>scr1</i> deletion |                                                       |
| $\Delta scr1$ -yz-up-F                           | TTTCCAATCCTCTCTCATCGT                                 |
| $\Delta scr1$ -yz-kanMX6-R                       | GGACAATTCAACGCGTC                                     |
| $\Delta scr1$ -yz-kanMX6-F                       | GCCTGTTGAACAAGTCTG                                    |
| $\Delta scr1$ -yz-natMX6-R                       | GCATGCTCATGTAGAGCGCC                                  |
| $\Delta scr1$ -yz-natMX6-F                       | GTACCACTCTTGACGACACG                                  |
| $\Delta scr1$ -yz-down-R                         | CTGAACAATGGAACCTCAAATG                                |
| Primers for verification of <i>rst2</i> deletion |                                                       |
| $\Delta rst2$ -yz-up-F                           | CCTTACATTTCCGATTCTCC                                  |
| $\Delta rst2$ -yz-kanMX6-R                       | GGACAATTCAACGCGTC                                     |
| $\Delta rst2$ -yz-kanMX6-F                       | GCCTGTTGAACAAGTCTG                                    |
| $\Delta rst2$ -yz-natMX6-R                       | GCATGCTCATGTAGAGCGCC                                  |
| $\Delta rst2$ -yz-natMX6-F                       | GTACCACTCTTGACGACACG                                  |
| $\Delta rst2$ -yz-down-R                         | TGTTCTTTTAAGGGCCGTC                                   |

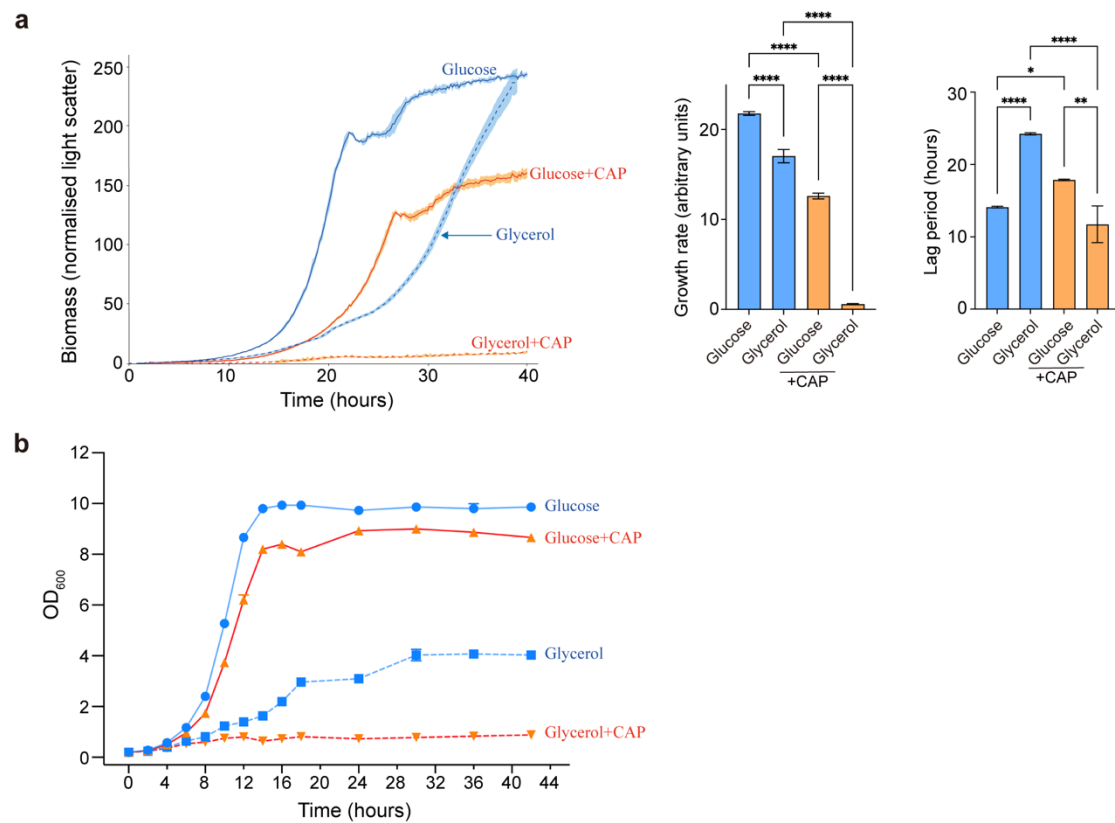

**Fig. S1 Growth measurement with or without CAP treatment in glucose or glycerol media. (a)** Quantitative growth assays of wild-type cells with or without CAP treatment in glucose or glycerol media. Cells were precultured overnight in YES medium and subsequently diluted to an initial OD<sub>600</sub> of 0.2 in fresh YES. After ~4 hours of cultivation to mid-exponential phase, the cultures were further diluted with 1.5 mL of fresh YES media supplemented with YES containing either 3% glucose (Glucose) or 3% glycerol and 0.1% glucose (Glycerol) to an initial OD<sub>600</sub> of 0.02 (Time 0). Growth (biomass accumulation) was monitored in real time using a microbioreactor, with measurements taken every 10 min and normalised to Time 0. Left graph: Mean growth curves are shown with standard deviation (shaded regions) from three independent replicates. Middle and right graphs: Growth rates and lag phases were quantified from the left graph. The statistical analysis was conducted by one-way ANOVA, followed by Tukey's honest significance test (\*,  $p < 0.05$ ; \*\*,  $p < 0.01$ ; and \*\*\*,  $p < 0.0001$ ). **(b)** Growth curves (OD<sub>600</sub>) of cultures grown under the same conditions as those used for RNA extraction. Cells were precultured overnight in YES medium, and cultures were diluted to an initial OD<sub>600</sub> of 0.2 (Time 0) as described in Methods 2.2. OD<sub>600</sub> was measured every 2 hours up to 18 hours and every 6 hours thereafter. Growth curves are representative of three independent experiments.

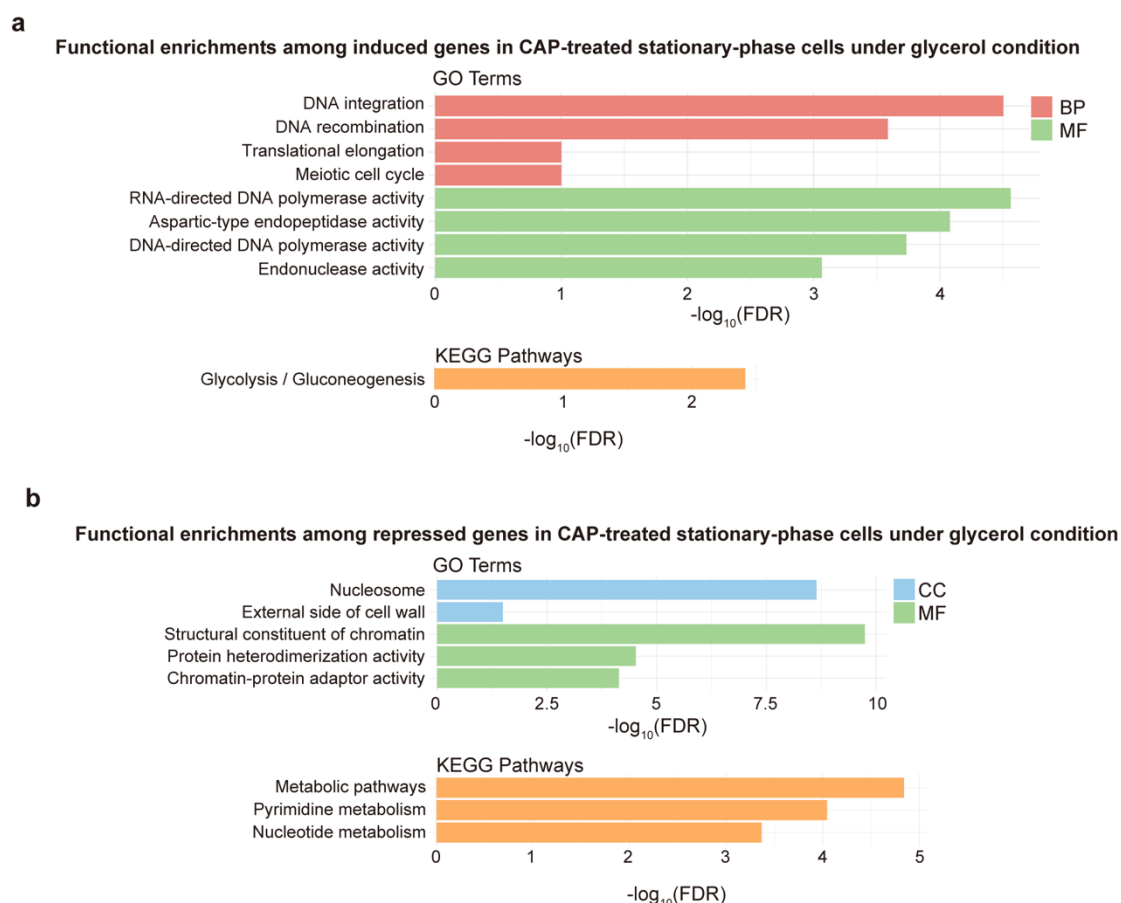

**Fig. S2 GO term and KEGG pathway enrichment analysis of 141 induced (a) and 250 repressed (b) genes following CAP treatment during stationary phase in glycerol medium. GO terms are grouped by category: BP (Biological Process), CC (Cellular Component), and MF (Molecular Function), and were selected for non-redundancy, specificity, and significance.**

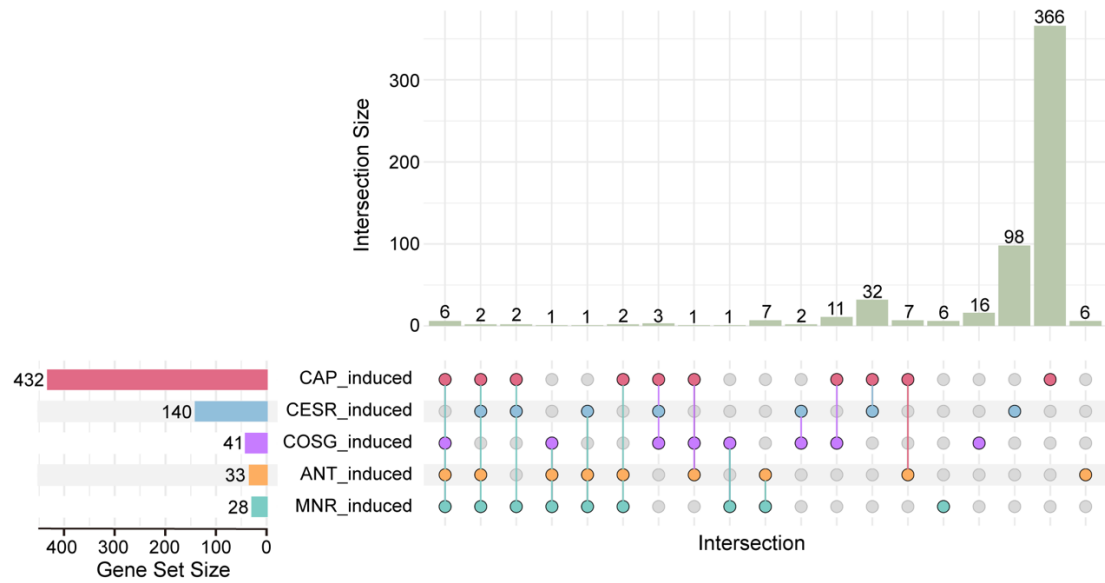

**Fig. S3 Overlaps of genes induced in CAP-treated stationary-phase cells grown in glucose medium with genes induced in different stress conditions (as in Fig. 1c).** The gene sets include the core environmental stress response (CESR), core oxidative stress genes (COSG), antimycin A treatment (ANT), and the mito-nuclear retrograde (MNR) response. The gene set size (left) indicates the number of genes in each set. Each column of circles represents a specific intersection between the different gene sets, as indicated by the colored circles. Bars (top) indicate the corresponding numbers of genes for each intersection. The plot was generated using *ComplexUpset* package in R (version 4.4.1, R Foundation for Statistical Computing, Vienna, Austria).

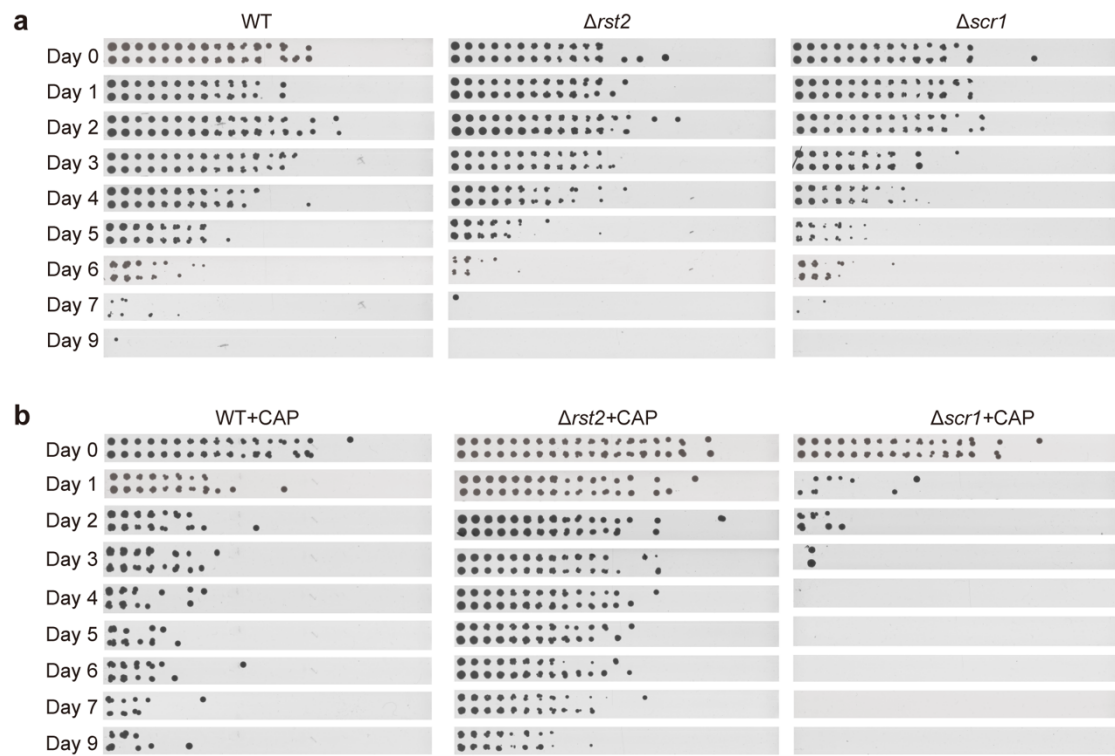

**Fig. S4 Chronological lifespan assays.** Wild type,  $\Delta rst2$  and  $\Delta scr1$  cells were precultured overnight in YES medium at 32°C, diluted to an initial OD<sub>600</sub> of 0.02 and grown to stationary phase (Day 0) without (**a**) or with (**b**) CAP treatment. Cell viability was monitored over time by a robotics-based colony-forming unit (CFU) assay. CFUs were measured daily from Day 0 to Day 7 and at Day 9. At each time point, aliquots of ageing cultures were collected, 3-fold serially diluted, and spotted onto YES agar plates. Plates were incubated at 32°C for 3 days and subsequently imaged. Three independent biological replicates were prepared for each condition.

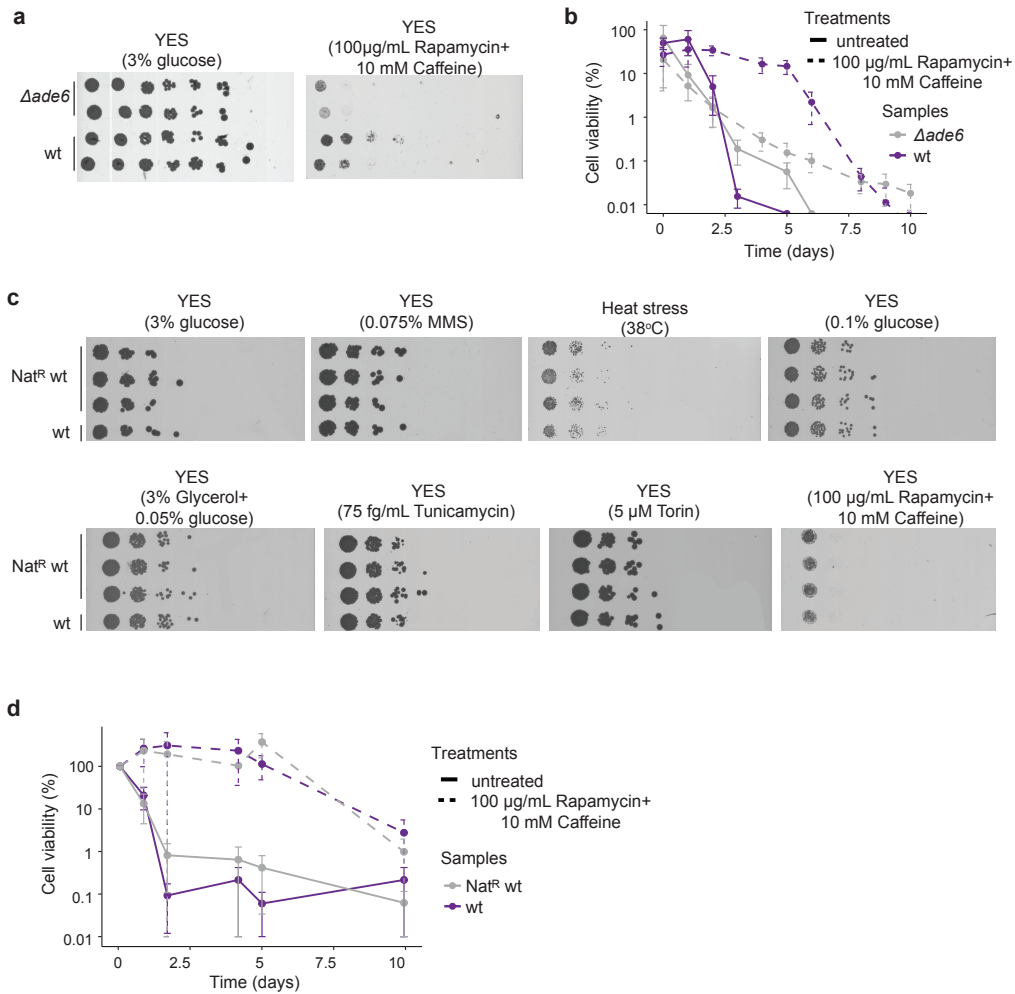

**Fig. S5 The Nat<sup>R</sup> wild-type strain, unlike the  $\Delta ade6$  strain, shows no phenotypic differences compared to the original wild-type.** (a) Spot assays comparing  $\Delta ade6$  and wild-type cells on YES (3% glucose) and YES (3% glucose) supplemented with 100 μg/mL rapamycin + 10 mM caffeine. Cultures were adjusted to OD<sub>600</sub> = 0.2, serially diluted 1:3, and spotted (left to right) onto the indicated plates. Plates were incubated at 32°C for 2-3 days. (b) Chronological lifespan assay of wild-type and  $\Delta ade6$  strains with or without 100 μg/mL rapamycin + 10 mM caffeine. Cells were grown in YES to stationary phase (Day 0). Viability was assessed over time using a robotics-based colony-forming unit (CFU) assay, with values normalized to Day 0 (100%). At each time point, ageing cultures were serially diluted 1:3, spotted onto YES plates, and imaged after three days. Data represent three biological replicates; error bars show standard deviation (SD). (c) Spot assays comparing Nat<sup>R</sup> wild-type and the original wild-type under: DNA damage (0.075% MMS), heat stress (38°C), low glucose (0.1%), non-fermentable carbon source (3% glycerol + 0.05% glucose), ER stress (75 fg/mL Tunicamycin), TOR inhibition (5 μM Torin), and Rapamycin + Caffeine (100 μg/mL + 10 mM). Cultures were adjusted to OD<sub>600</sub> = 0.2, serially diluted 1:10, and spotted and incubated as above. (d) Chronological lifespan assay of Nat<sup>R</sup> wild-type and wild-type cells with or without rapamycin + caffeine. Assay was carried out as described in (b) above.



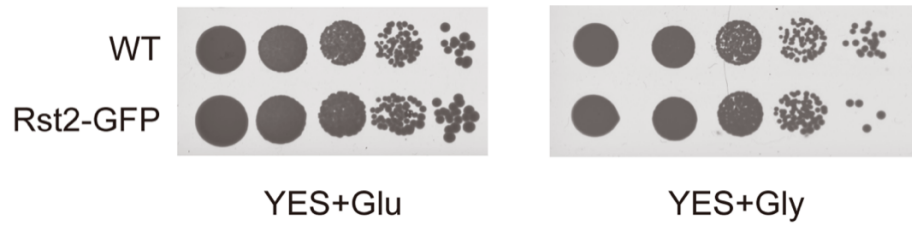

**Fig. S6 Growth assessment of the Rst2-GFP strain.** The strain expressing C-terminally GFP-tagged Rst2 from its endogenous promoter was precultured overnight, diluted to an initial OD<sub>600</sub> of 0.2, and grown to OD<sub>600</sub> of 1. Cells were then collected, and 10-fold serial dilutions were spotted onto YES plates containing either 3% glucose or 3% glycerol supplemented with 0.1% glucose. The plates were incubated at 32°C for 3 days and photographed.
