# Supplementary figures and images for: Mitochondrial Translation Inhibition Triggers an Rst2-Controlled Transcriptional Reprogramming of Carbon Metabolism in Stationary-Phase Cells of Fission Yeast
Source: MDPI journal article supplement (doi:10.3390/biom15101354), 2025-09-24

Fig. 5e

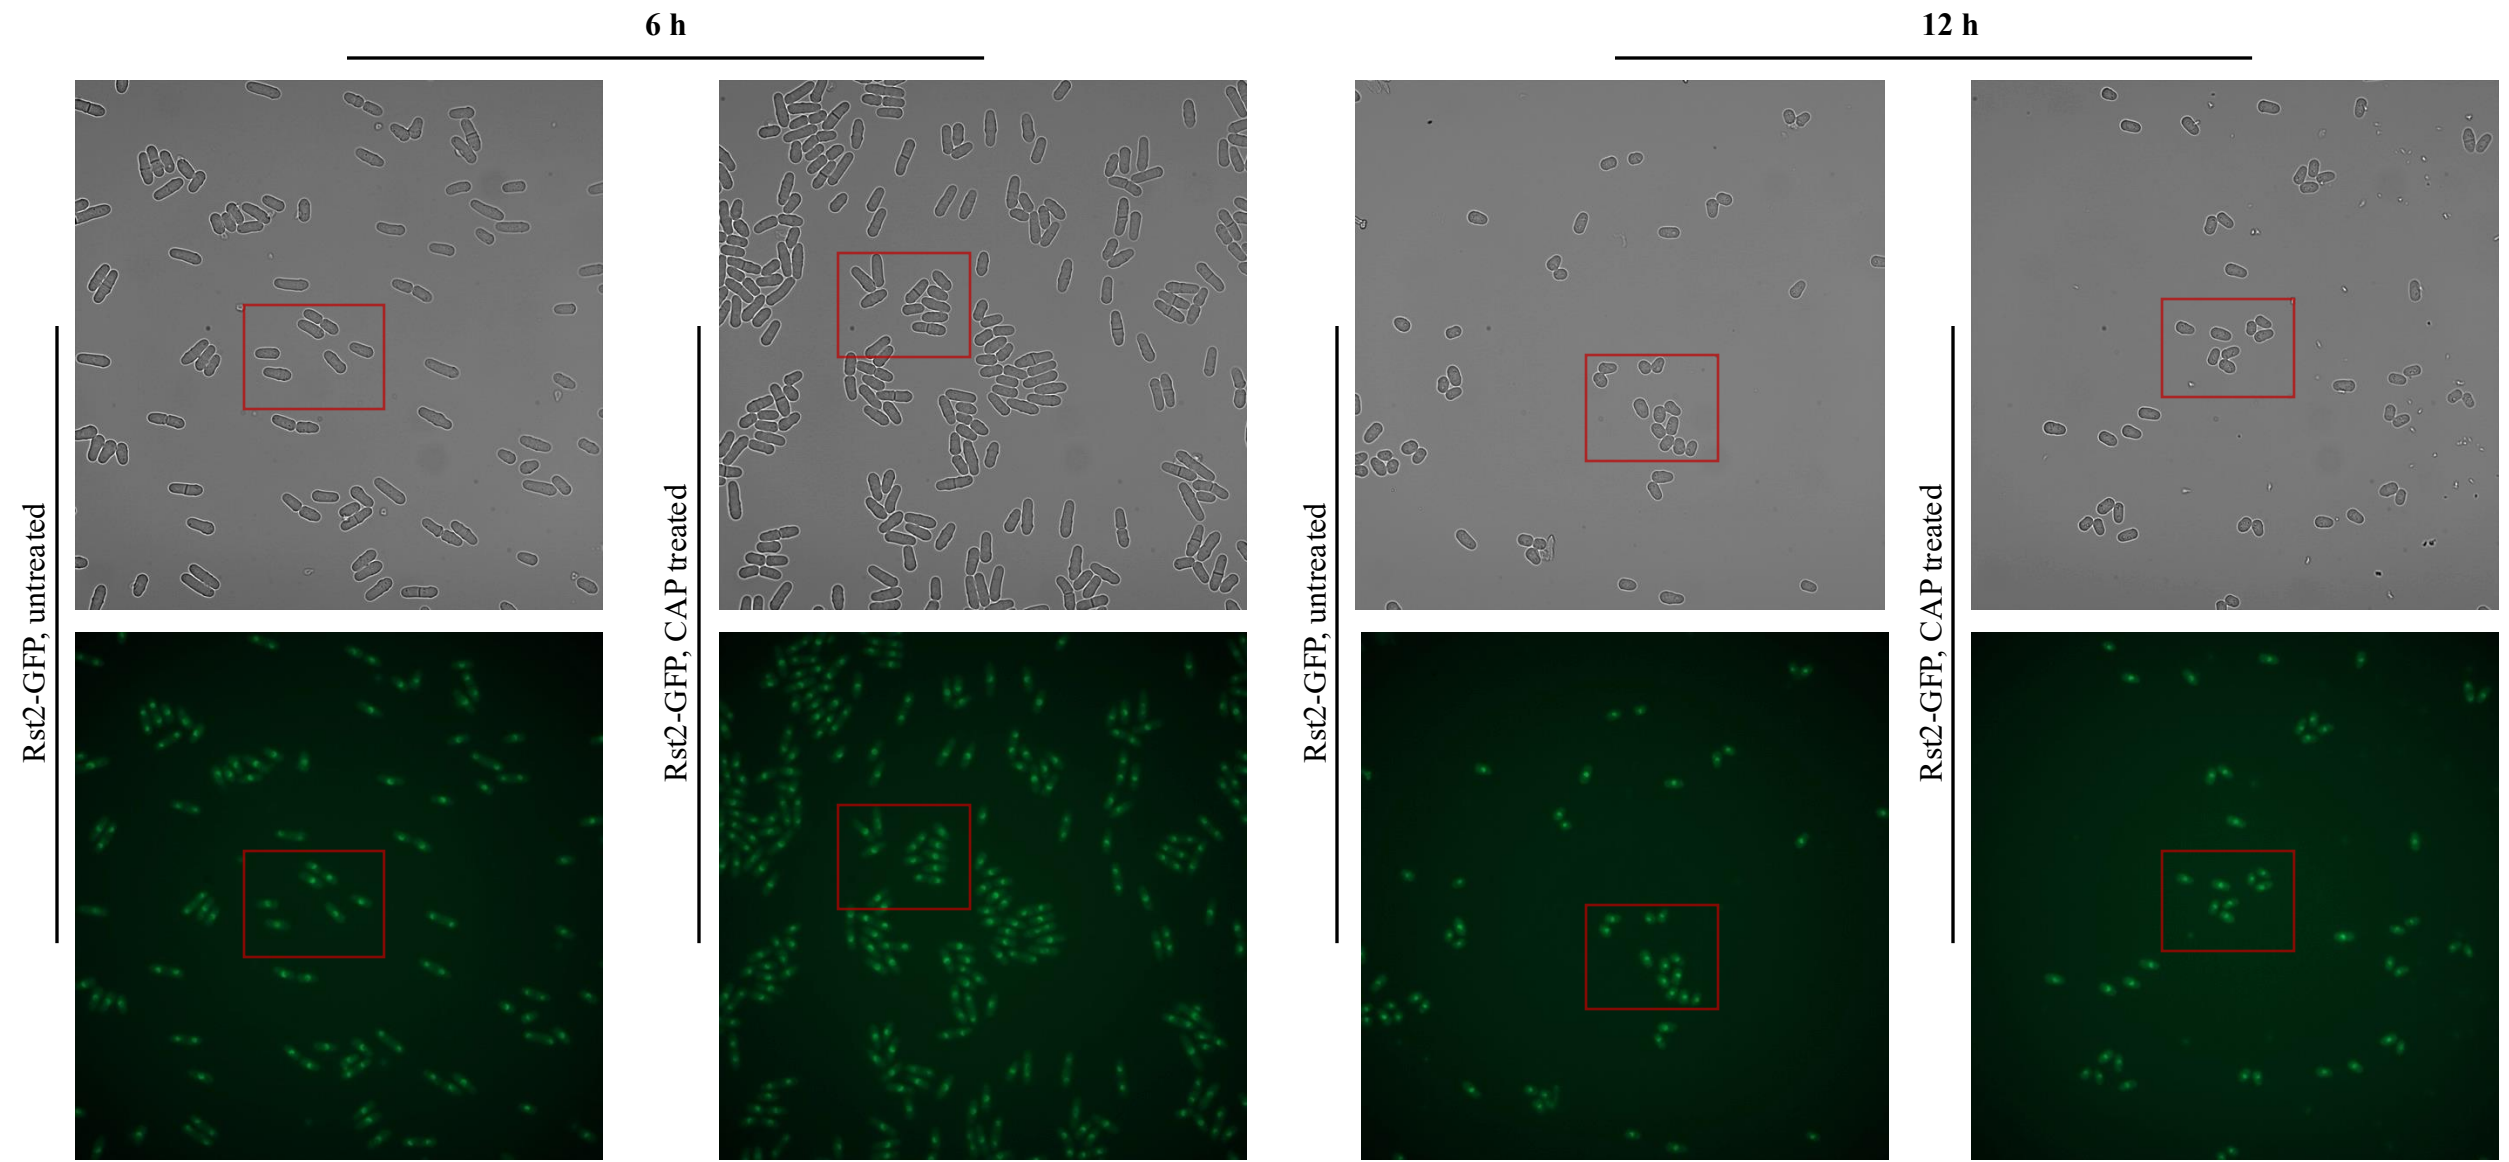

Fig. 5e

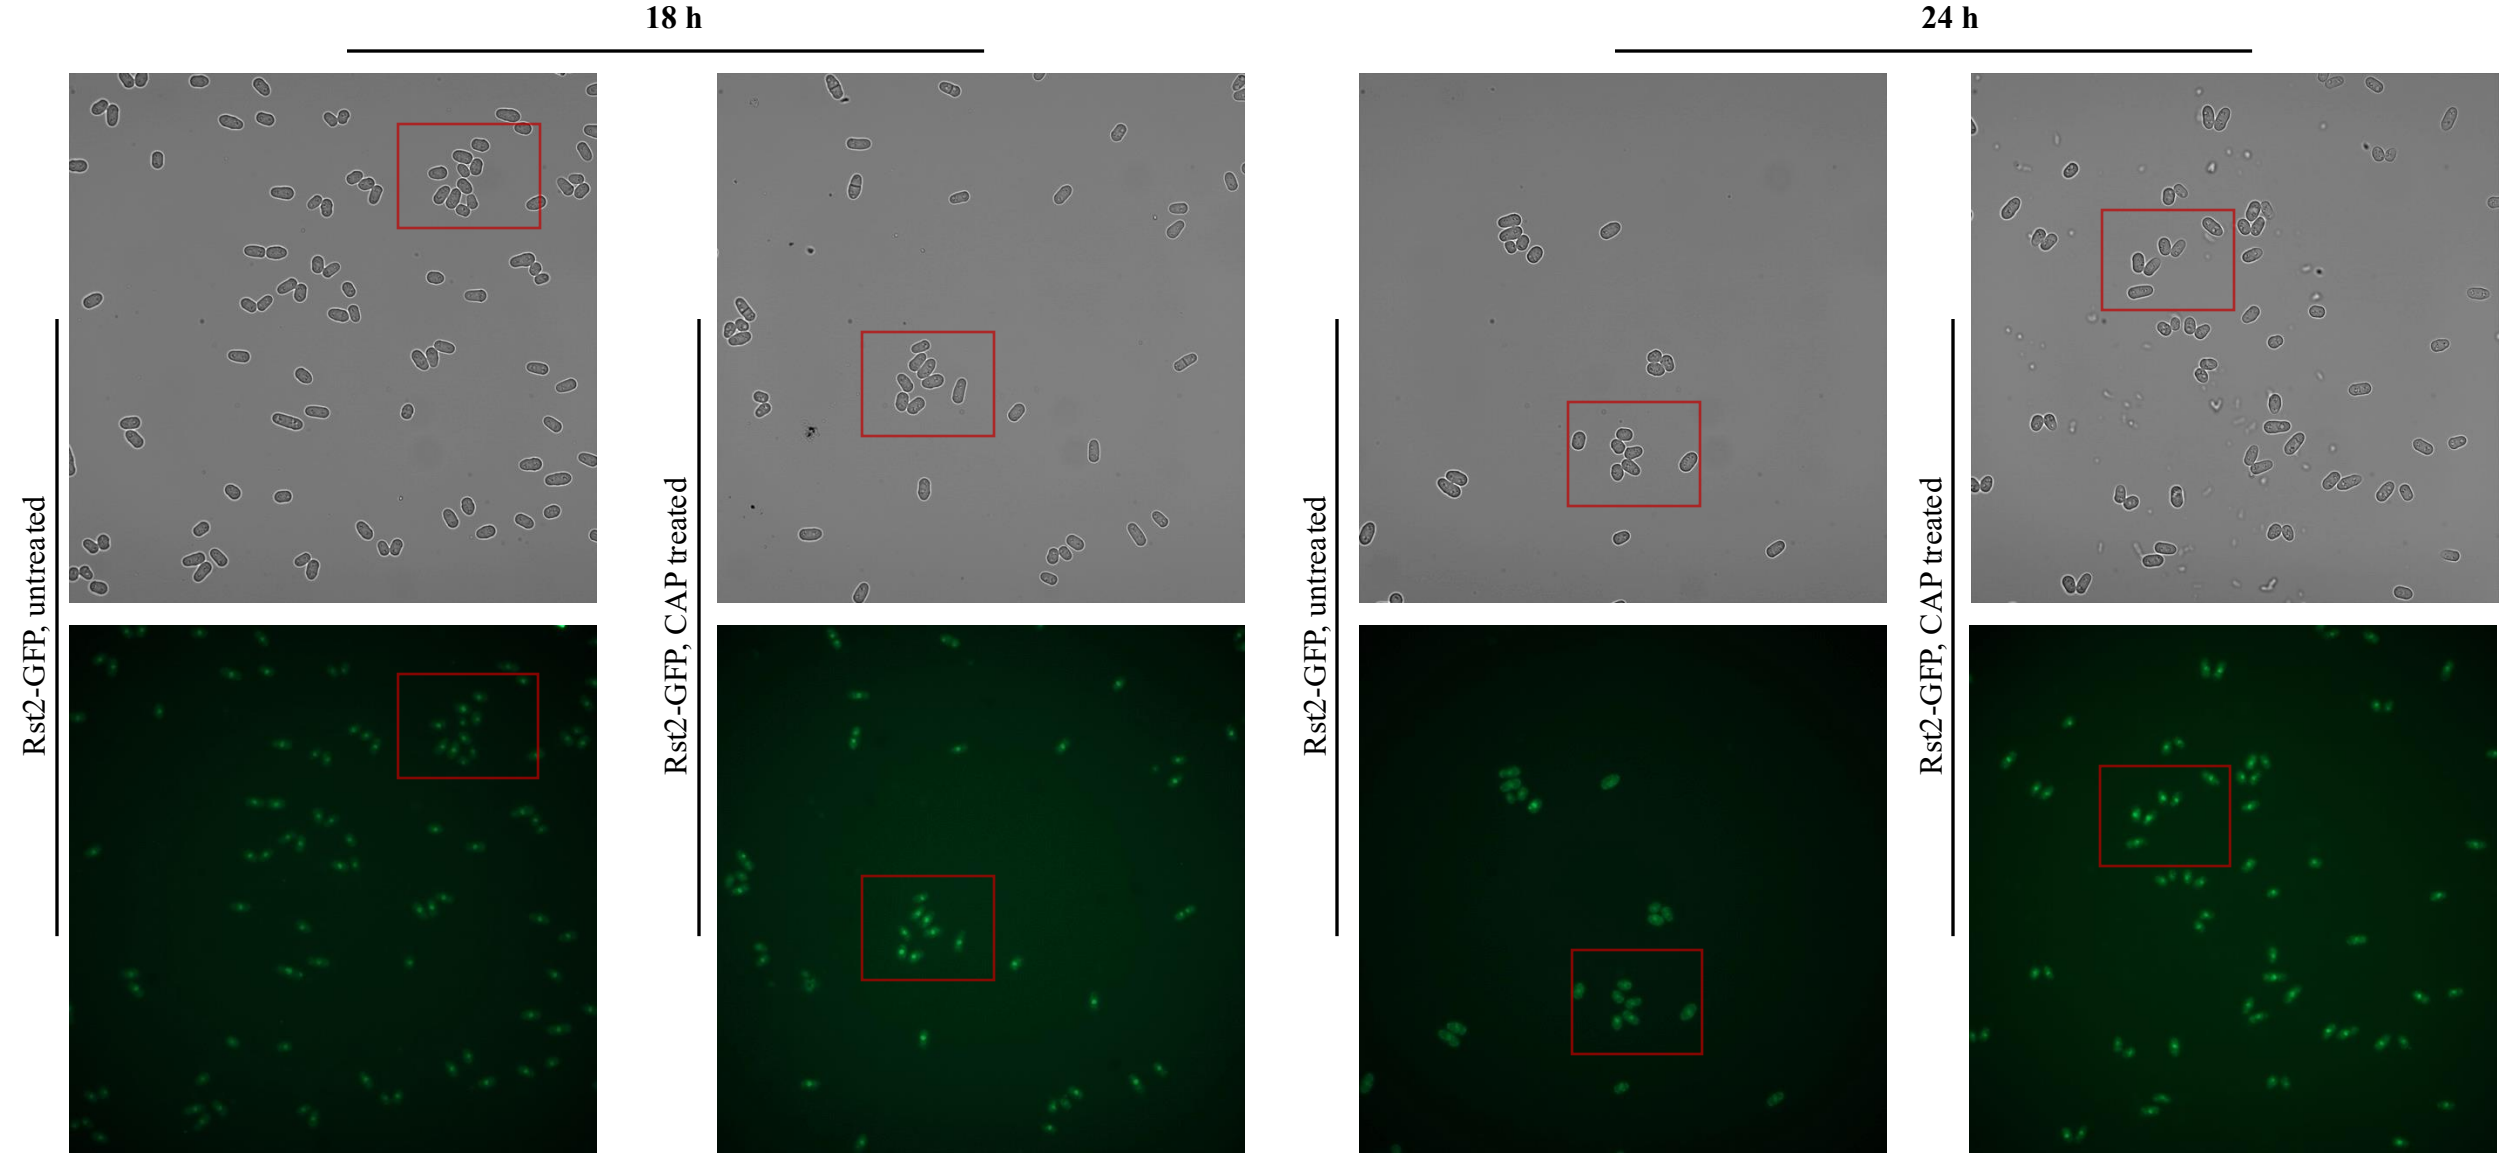

Fig. 5e

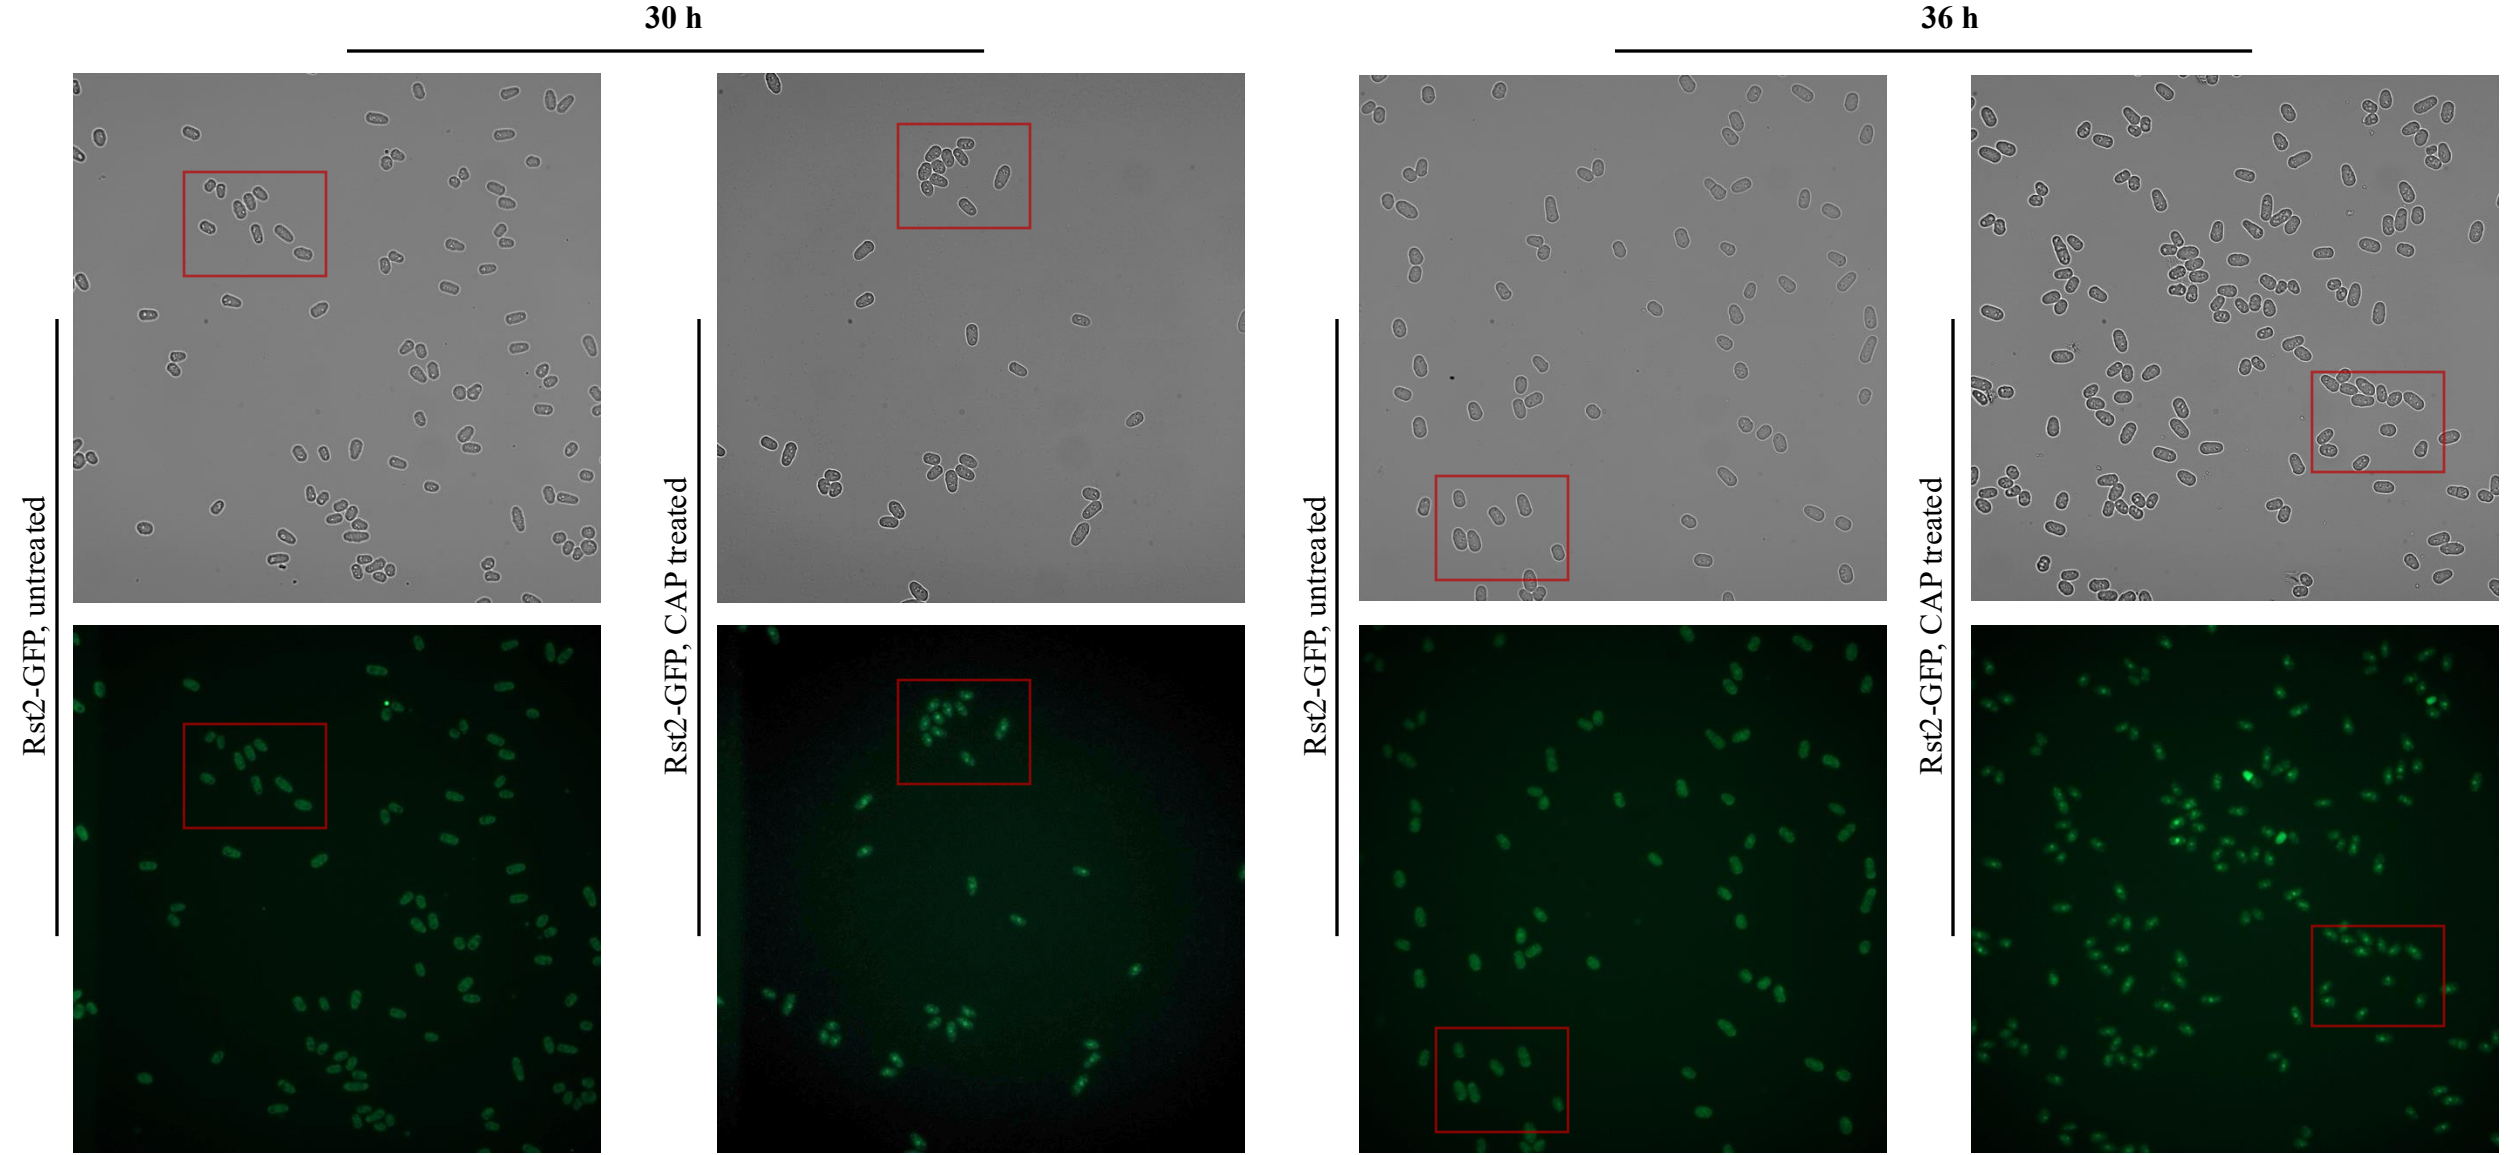

Supplement: s1 [file Supplementary File S1 Original Microscopy Images.pdf › Supplementary File S1 Original Microscopy Images.pdf]
